# Supplementary material for: The effect of rehabilitation interventions on physical function and immobility-related complications in severe stroke: a systematic review
Source: BMJ Open. 2020 Feb 5;10(2):e033642. doi: 10.1136/bmjopen-2019-033642 (PMC7045156; doi:10.1136/bmjopen-2019-033642)
Supplement: Supplementary data [file bmjopen-2019-033642supp002.pdf]

**Supplementary File 2**

## Supplementary Material- Medline Search Strategy

1. exp Stroke/
2. severe stroke.mp.
3. stroke severit\*.mp.
4. stroke disabilit\*.mp.
5. exp Physical Therapy Modalities/
6. exp Occupational Therapy/
7. exp Nursing Care/
8. physical rehabilitation.mp.
9. exp Stroke Rehabilitation/
10. exp Patient Positioning/
11. exp Posture/
12. exp Exercise/
13. exp Exercise Therapy/
14. passive exercise.mp.
15. exp "Range of Motion, Articular"/
16. manual technique.mp.
17. active exercise.mp.
18. Resistance Training/
19. exp Muscle Stretching Exercises/
20. exp Electric Stimulation/
21. exp Electric Stimulation Therapy/
22. exp Wheelchairs/
23. seat?.mp.
24. exp "Equipment and Supplies"/
25. exp Teaching/
26. exp Education/
27. exp Motor Skills/
28. exp Movement/
29. motor function.mp.
30. motor recovery.mp.
31. exp "Recovery of Function"/
32. exp "Activities of Daily Living"/
33. functional independence.mp.
34. physical independence.mp.
35. complicatio\*.mp.
36. exp Pain/
37. exp Contracture/
38. exp Pressure Ulcer/
39. exp Respiratory Tract Infections/
40. exp Urinary Tract Infections
41. Muscle Spasticity/
42. Venous Thrombosis/
44. exp Pulmonary Embolism/
44. exp Accidental Falls/
45. exp Fatigue/
46. exp Depression/
47. 1 or 2 or 3 or 4

48. 5 or 6 or 7 or 8 or 9 or 10 or 11 or 12 or 13 or 14 or 15 or 16 or 17 or 18 or 19 or 20 or 21 or 22 or 23 or 24 or 25 or 26
49. 27 or 28 or 29 or 30
50. 31 or 32 or 33 or 34
51. 35 or 36 or 37 or 38 or 39 or 40 or 41 or 42 or 43 or 44 or 45 or 46
52. 47 and 48 and 49
53. 47 and 48 and 50
54. 47 and 48 and 51
55. limit 52 to ("all adult (19 plus years)" and randomized controlled trial)
56. limit 53 to ("all adult (19 plus years)" and randomized controlled trial)
57. limit 54 to ("all adult (19 plus years)" and randomized controlled trial)

Supplementary Table 1- Studies conducted in the acute – early subacute (&lt;3 months) phase post-stroke

| Study                                             | Intervention Description                                                                              | Intervention Duration | Intervention Delivered By | Stroke Severity Measure | Sample Size and Characteristics                                                                                                                                          | Main Outcome Measures                                                             | Main Results                                                                                                                                                                     | Quality of Evidence |
|---------------------------------------------------|-------------------------------------------------------------------------------------------------------|-----------------------|---------------------------|-------------------------|--------------------------------------------------------------------------------------------------------------------------------------------------------------------------|-----------------------------------------------------------------------------------|----------------------------------------------------------------------------------------------------------------------------------------------------------------------------------|---------------------|
| AVERT trial collaboration group 2015 <sup>1</sup> | Very early mobilisation vs Usual care                                                                 | Up to 14 days         | PT and nursing staff      | NIHSS                   | Very early mobilisation group<br>NIHSS >16 (n=147)<br><br>Usual care group<br>NIHSS >16 (n=144)                                                                          | Favourable outcome (mRS 0-2) and mortality at 3 months                            | No difference in favourable outcome or mortality between groups                                                                                                                  | High                |
| Bagley et al. 2005 <sup>2</sup>                   | Oswestry standing frame + standard physiotherapy vs Standard physiotherapy                            | 14 daily sessions     | PTs                       | BI^                     | Oswestry group (n=71)<br>Median BI 1 (IQR 0-3)<br><br>Control group (n=69)<br>Median BI 2 (IQR 1-3)                                                                      | RMI, BI, HADS, NEADL, RMA, MAS (balance, sit to stand sections), TCT, CSI, GHQ-28 | No differences between groups for all outcome measures. No differences in number of treatment sessions between groups or number of staff members required to treat each patient. | Low                 |
| Bradley et al. 1998 <sup>3</sup>                  | EMG biofeedback + conventional physiotherapy vs Placebo EMG + conventional physiotherapy              | 6 weeks               | PTs                       | RMI                     | EMG group<br>RMI ≤3 (n=7)<br><br>Conventional PT group<br>RMI ≤3 (n=6)                                                                                                   | MBS, mAS, 10MWT, RMI, sensation, proprioception<br>NEADL                          | No differences between groups for MBS, RMI, NEADL and 10MWT. No improvements in mAS, sensation and proprioception for both groups.                                               | Very low            |
| Chang et al. 2012 <sup>4</sup>                    | Robot-assisted BWS treadmill gait training + conventional physiotherapy vs Conventional physiotherapy | 2 weeks               | PTs                       | FAC<br>LL FMA           | Robot-assisted group (n=20)<br>Mean FAC 0.5 (SD 0.5)<br>Mean LL FMA 17.2 (SD 5.5)<br><br>Conventional group (n=17)<br>Mean FAC 0.4 (SD 0.5)<br>Mean LL FMA 16.8 (SD 5.7) | FAC, LL MI, LL FMA, Peak VO <sub>2</sub>                                          | Improvements in LL FMA and peak VO <sub>2</sub> in robot-assisted gait training group. No improvements in LL MI and FAC for both groups.                                         | Low                 |

|                                       |                                                                                                  |         |                                                                      |               |                                                                                                                                                                                   |                                                                    |                                                                                                                                                                           |          |
|---------------------------------------|--------------------------------------------------------------------------------------------------|---------|----------------------------------------------------------------------|---------------|-----------------------------------------------------------------------------------------------------------------------------------------------------------------------------------|--------------------------------------------------------------------|---------------------------------------------------------------------------------------------------------------------------------------------------------------------------|----------|
| Chen et al. 2011 <sup>5</sup>         | Thermal stimulation + standard rehabilitation vs Standard rehabilitation                         | 6 weeks | Thermal stimulation- PTs<br><br>Standard rehabilitation- PTs and OTs | FAC<br>LL FMA | Thermal stimulation group (n=17)<br>Median FAC 0 (IQR 0-1)<br>Median LL FMA 7 (4-11.5)<br><br>Standard rehab group (n=16)<br>Median FAC 0 (IQR 0-1)<br>Median LL FMA 6 (4.3-12.0) | LL FMA, LL MRC, mAS, mMAS, PASS (trunk control items), BBS, FAC    | Thermal stimulation group demonstrated greater recovery gains compared to standard rehabilitation group in all outcomes except PASS. No difference between groups in MAS. | Low      |
| Di Lauro et al. 2003 <sup>6</sup>     | Intensive rehabilitative treatment vs Ordinary rehabilitative treatment                          | 14 days | Therapists and nursing staff                                         | BI ^          | Intensive rehab group (n=29)<br>Mean BI 1.4 (SD 1.4)<br><br>Ordinary rehab group (n=31)<br>Mean BI 1.5 (SD 1.5)                                                                   | BI, mNIHSS                                                         | No differences between groups in BI or mNIHSS                                                                                                                             | Very low |
| Fong et al. 2013 <sup>7</sup>         | Cueing wristwatch + conventional rehabilitation vs Sham wristwatch + conventional rehabilitation | 3 weeks | Wristwatch- OTs<br><br>Conventional rehab- OT, PT, ST                | Motor FIM     | Cueing wristwatch group (n=19) Mean motor FIM 25.6 (SD 8.3)<br><br>Sham wristwatch group (n=16)<br>Mean motor FIM 28.2 (SD 10.0)                                                  | UL FMA, FTHUE, motor FIM, total number of UL movements             | No differences between groups for UL FMA, FTHUE and motor FIM. More total UL movements in cueing wristwatch group but not significantly different between groups.         | Low      |
| Franceschini et al. 2009 <sup>8</sup> | BWS treadmill gait training + conventional treatment vs Conventional treatment                   | 4 weeks | PTs                                                                  | BI ^          | Treadmill training group (n=52)<br>Median BI 6 (IQR 3-9)<br>Median FAC 0 (IQR 0-0)<br><br>Conventional group (n=45)<br>Median BI 5 (IQR 3-7)<br>Median FAC 0 (IQR 0-0)            | MI, TCT, mRS, BI, FAC, AS, LL proprioception, 6MWT, 10MWT, BS, WHS | No differences between groups. All patients were able to walk at discharge.                                                                                               | Low      |

|                                      |                                                                                                                                       |            |                                                                  |     |                                                                                                                                                              |                                                         |                                                                                                                                                                                                                                                                                             |          |
|--------------------------------------|---------------------------------------------------------------------------------------------------------------------------------------|------------|------------------------------------------------------------------|-----|--------------------------------------------------------------------------------------------------------------------------------------------------------------|---------------------------------------------------------|---------------------------------------------------------------------------------------------------------------------------------------------------------------------------------------------------------------------------------------------------------------------------------------------|----------|
| Katz-Leurer et al. 2003 <sup>9</sup> | Leg cycle ergometer + regular therapy vs Regular therapy                                                                              | 8 weeks    | Leg cycle ergometer- PTs<br>Regular therapy- PT, OT, ST          | SSS | Leg cycle ergometer and regular rehabilitation groups- actual number of patients with severe stroke (SSS <30) not reported                                   | FAI                                                     | No differences in decline in FAI between groups                                                                                                                                                                                                                                             | Low      |
| Liang et al. 2012 <sup>20</sup>      | Thermal stimulation + standard rehabilitation vs Standard rehabilitation                                                              | 6 weeks    | Thermal stimulation- PTs<br>Standard rehabilitation- PTs and OTs | BI* | Thermal stimulation group (n=15)<br>Mean BI 30.3 (SD 11.1)<br><br>Standard rehab group (n=15)<br>Mean BI 27.7 (SD 14.3)                                      | LL FMA, LL MRC, FAC, BBS, mMAS, BI                      | Improvements in LL FMA, LL MRC, FAC and mMAS in thermal stimulation group post-intervention and at 3-month follow-up. Improvements in BBS and BI in thermal stimulation group only at 3-month follow-up. Except for LL-FMA, all improvements disappeared at 6-month and 12-month follow-up. | Low      |
| Lincoln et al. 1999 <sup>11</sup>    | Standard physiotherapy + additional qualified PT therapy vs Standard physiotherapy + additional PTA therapy vs Standard physiotherapy | 5 weeks    | PTs/ PTAs                                                        | BI^ | Qualified PT group (n=94)<br>Median BI 6 (IQR 3-9)<br><br>PTA group (n=93)<br>Median BI 6 (IQR 4-8)<br><br>Standard PT group (n=95)<br>Median BI 7 (IQR 3-9) | RMA- arm scale, ARAT, THPT, grip strength, mAS, BI, MCA | No differences between the groups across all outcomes                                                                                                                                                                                                                                       | Low      |
| Min et al. 2008 <sup>12</sup>        | Acupuncture + systemic functional exercise vs Systemic functional exercise                                                            | ? 3 months | Not reported                                                     | BI* | Acupuncture group (n=30)<br>Mean BI 27.28 (SD 5.41)<br><br>Systemic exercise group (n=30)<br>Mean BI 28.01 (SD 4.48)                                         | FMA, BI                                                 | Acupuncture group demonstrated greater improvements in FMA and BI compared to the systemic exercise group                                                                                                                                                                                   | Very low |

|                                           |                                                                                                                                         |              |                                                                               |                     |                                                                                                                                                                                   |                                                          |                                                                                                                                                                                |          |
|-------------------------------------------|-----------------------------------------------------------------------------------------------------------------------------------------|--------------|-------------------------------------------------------------------------------|---------------------|-----------------------------------------------------------------------------------------------------------------------------------------------------------------------------------|----------------------------------------------------------|--------------------------------------------------------------------------------------------------------------------------------------------------------------------------------|----------|
| Ochi et al. 2015 <sup>13</sup>            | Robot-assisted treadmill gait training + standard physiotherapy<br>vs<br>Conventional overground gait training + standard physiotherapy | 4 weeks      | Robot-assisted gait training- not reported<br>Conventional gait training- PTs | FIM mobility<br>FAC | Robot-assisted group (n=13) Median FAC 0 (IQR 0-1)<br>Median FIM mobility 7 (IQR 6-10)<br><br>Conventional group (n=13) Median FAC 1 (IQR 0-1)<br>Median FIM mobility 7 (IQR 7-9) | FAC, FMA, LL muscle torque, 10MWT, FIM (mobility scores) | Robot-assisted gait training group demonstrated greater improvements in FAC and peak LL muscle torque compared to the conventional group                                       | Low      |
| Rosewilliam et al. 2012 <sup>14</sup>     | Wrist and finger NMES + usual care<br>vs<br>Usual care                                                                                  | 6 weeks      | NMES- staff group not reported, patients and carers<br><br>Usual care- PTs    | BI^                 | NMES group (n=31)<br>Mean BI 4.4 (SD 3.9)<br>Mean ARAT 0.0 (SD 0.0)<br><br>Usual care group (n=36)<br>Mean BI 2.5 (SD 2.9)<br>Mean ARAT 0.6 (SD 3.5)                              | ARAT, BI, wrist AROM, wrist strength, grip strength      | No differences in ARAT, BI or wrist AROM between groups. Improvements in wrist extensor and grip strength in the NMES group post-intervention but not maintained at follow-up. | Moderate |
| Sanchez-Sanchez et al. 2014 <sup>15</sup> | Functionally targeted physiotherapy techniques + conventional physiotherapy<br>vs<br>Conventional physiotherapy                         | Not reported | PTs                                                                           | BI*                 | Functional techniques group (n=5)<br>Mean BI 13 (SD 10.95)<br><br>Conventional therapy group (n=8)<br>Mean BI 11.43 (SD 13.13)                                                    | BI                                                       | Functionally targeted physiotherapy group demonstrated greater improvement compared to the conventional physiotherapy group when using functional principal component analysis | Very low |
| Tang et al. 2014 <sup>16</sup>            | Contemporary Bobath approach with early sitting, standing and walking<br>vs<br>Contemporary Bobath approach                             | 8 weeks      | PTs                                                                           | STREAM<br>BBS       | Early contemporary group (n=24)<br>Mean STREAM 1.4 (SD 1.0)<br>Mean BBS 0 (SD 0)<br><br>Contemporary group (n=24)<br>Mean STREAM 1.3 (SD 0.9)<br>Mean BBS 0 (SD 0)                | STREAM, BBS                                              | Improvements in STREAM and BBS in the contemporary Bobath approach with early mobilisation group                                                                               | Low      |

Supplementary Table 2- Studies conducted in the acute – late subacute (&lt;6 months) phase post-stroke

| Study                                             | Intervention Description                                                                                            | Intervention Duration | Intervention Delivered By | Stroke Severity Measure | Sample Size and Characteristics                                                                                                                               | Main Outcome Measures                                                         | Main Results                                                                                                                                                                                                                                                           | Quality of Evidence |
|---------------------------------------------------|---------------------------------------------------------------------------------------------------------------------|-----------------------|---------------------------|-------------------------|---------------------------------------------------------------------------------------------------------------------------------------------------------------|-------------------------------------------------------------------------------|------------------------------------------------------------------------------------------------------------------------------------------------------------------------------------------------------------------------------------------------------------------------|---------------------|
| Bai et al. 2014 <sup>17</sup>                     | Staged physical rehabilitation interventions + routine care vs Routine care                                         | 6 months              | PTs and OTs               | BI*                     | Staged rehab group (n=83)<br>Mean BI 28 (range 24-31)<br><br>Routine care group (n=82)<br>Mean BI 23 (range 19-27)                                            | BI, mAS                                                                       | Staged rehab group demonstrated higher BI scores than the routine care group at 1, 3- and 6-months post-stroke. 42.9% of patients in the routine care group demonstrated spasticity in at least one body part compared to 36.4% of patients in the staged rehab group. | Low                 |
| Calabrò et al. 2015 <sup>18</sup>                 | Robotic verticalisation + standard physiotherapy vs Physiotherapy-assisted verticalisation + standard physiotherapy | 6 weeks               | PTs                       | PASS<br>LL FMA          | Robotic group (n=10)<br>Mean PASS 3 (SD 1)<br>Mean LL FMA 13 (SD 3)<br><br>Physiotherapy group (n=10)<br>Mean PASS 3 (SD 3)<br>Mean LL FMA 12 (SD 6)          | PASS, LL FMA, MRC, vertical posture tolerance                                 | Both interventions were well tolerated. Robotic group demonstrated greater improvements in MRC, LL FMA and PASS compared to the physiotherapy group                                                                                                                    | Very low            |
| Chaiyawat and Kulkantrakorn 2012 <sup>19,20</sup> | Home based physiotherapy programme vs Usual care                                                                    | 6 months              | PTs                       | BI*                     | Home PT group (n=30)<br>Mean BI 31.7 (SD 5.9)<br>Mean NIHSS 16.4 (SD 4.1)<br><br>Usual care group (n=30)<br>Mean BI 33.2 (SD 4.8)<br>Mean NIHSS 17.8 (SD 3.9) | BI, HADS, mRS, EQ-5D                                                          | Home therapy group demonstrated greater improvements in BI, HADS, mRS and EQ-5D compared to the usual care group which were maintained at 2-year follow-up.                                                                                                            | Very low            |
| Jongbloed et al. 1989 <sup>21</sup>               | Functional treatment approach vs Sensorimotor integrative treatment approach                                        | 8 weeks               | OTs                       | BI*                     | Functional treatment group (n=13)<br>Mean BI 31.5<br><br>Sensorimotor integrative treatment group (n=9)<br>Mean BI 30                                         | BI, meal preparation, eight subtests of Sensorimotor Integration Test Battery | No differences between groups on all outcome measures                                                                                                                                                                                                                  | Very low            |

|                                                                                  |                                                                                                                                                         |          |             |     |                                                                                                                                                                                                                                                   |                                                          |                                                                                                                                                                                                                                                                                                                                                                                                                                                                                                                                                                                                                                        |          |
|----------------------------------------------------------------------------------|---------------------------------------------------------------------------------------------------------------------------------------------------------|----------|-------------|-----|---------------------------------------------------------------------------------------------------------------------------------------------------------------------------------------------------------------------------------------------------|----------------------------------------------------------|----------------------------------------------------------------------------------------------------------------------------------------------------------------------------------------------------------------------------------------------------------------------------------------------------------------------------------------------------------------------------------------------------------------------------------------------------------------------------------------------------------------------------------------------------------------------------------------------------------------------------------------|----------|
| Kwakkel et al.<br>1999 <sup>22</sup><br>2002 <sup>23</sup><br>2002 <sup>24</sup> | Additional UL training +<br>usual care<br>vs<br>Additional LL training +<br>usual care<br>vs<br>UL/LL pressure splint<br>immobilisation + usual<br>care | 20 weeks | PTs and OTs | BI^ | UL training group (n=33)<br>Median BI 5 (IQR 3-7)<br>LL training (n=31)<br>Median BI 6 (IQR 3-8)<br>Splint control group (n=37)<br>Median BI 5.5 (IQR 3-7)                                                                                        | BI, FAC, ARAT,<br>10MWT, SIP, NHP,<br>FAI                | LL training group had significantly<br>higher BI, FAC, walking speed and<br>ARAT than splint control group post-<br>intervention. UL training group had<br>significantly higher ARAT than splint<br>control group post-intervention. No<br>significant differences in all outcomes<br>were seen between groups from 6<br>months onwards up until 12-month<br>follow-up.                                                                                                                                                                                                                                                                | Moderate |
|                                                                                  |                                                                                                                                                         |          |             |     | CRP sub-study<br>UL training group (n=18)<br>Mean BI 5.0 (SD 2.0)<br>LL training (n=17)<br>Mean BI 6.3 (SD 2.7)<br>Splint control group (n=18)<br>Mean BI 5.3 (SD 2.7)                                                                            | 10MWT, mean CRP<br>of arm/leg<br>movements               | LL training group had significantly<br>higher comfortable walking speed<br>than UL and splint control groups<br>post-intervention. No differences<br>were seen for the mean CRP of<br>arm/leg movements between groups.                                                                                                                                                                                                                                                                                                                                                                                                                |          |
| Morone et al.<br>2011 <sup>25</sup><br>2012 <sup>26</sup>                        | Robot-assisted BWS<br>treadmill gait training +<br>standard physiotherapy<br>vs<br>Conventional gait<br>training + standard<br>physiotherapy            | 3 months | PTs         | BI* | Robotic groups<br>Low motricity (n=12)<br>Mean BI 14.2 (SD 11.8)<br>High motricity (n=12)<br>Mean BI 20.0 (SD 17.2)<br><br>Conventional groups<br>Low motricity (n=12)<br>Mean BI 7.9 (SD 8.9)<br>High motricity (n=12)<br>Mean BI 24.6 (SD 15.3) | FAC, LL AS, RMI, MI,<br>TCT, CNS, BI, RS,<br>6MWT, 10MWT | Higher FAC in low motricity robotic<br>training group compared to low<br>motricity conventional training group<br>post-intervention. At discharge,<br>higher RMI, BI, TCT, RS and 6MWT in<br>low motricity robotic training group<br>compared to low motricity<br>conventional training group. No<br>differences were seen between the<br>higher motricity groups post-<br>intervention or on discharge.<br>At 12-month follow-up, low motricity<br>robotic training group had higher<br>FAC, BI and RMI compared to low<br>motricity conventional training<br>group. No differences were seen<br>between the higher motricity groups. | Very low |

|                                   |                                                                           |          |                                                            |              |                                                                                                                                                                       |                |                                                                                                                    |          |
|-----------------------------------|---------------------------------------------------------------------------|----------|------------------------------------------------------------|--------------|-----------------------------------------------------------------------------------------------------------------------------------------------------------------------|----------------|--------------------------------------------------------------------------------------------------------------------|----------|
| Yang et al.<br>2014 <sup>27</sup> | Acupuncture +<br>rehabilitation training<br>vs<br>Rehabilitation training | 8 weeks  | Acupuncture-<br>not reported<br><br>Rehabilitation-<br>PTs | NIHSS<br>BI* | Acupuncture group (n=33)<br>Mean NIHSS 25.5 (SD 2.4)<br>Mean BI 39.4 (SD 3.9)<br><br>Rehabilitation group (n=31)<br>Mean NIHSS 24.1 (SD 3.1)<br>Mean BI 38.1 (SD 4.3) | NIHSS, FMA, BI | Acupuncture group demonstrated<br>higher scores on all outcome<br>measures compared to the<br>rehabilitation group | Very low |
| Yue et al.<br>2012 <sup>28</sup>  | Acupressure treatment<br>+ routine care<br>vs<br>Routine care             | 3 months | Nurses                                                     | BI*          | Acupressure group (n=35)<br>Mean BI 26.8 (SD 15.2)<br><br>Routine care group (n=34)<br>Mean BI 24.4 (SD 16.8)                                                         | FMA, BI        | Acupressure group demonstrated<br>greater improvements in BI and FMA<br>only at 3-month time frame                 | Very low |

Supplementary Table 3- Studies conducted in the chronic (&gt;6 months) phase post-stroke

| Study                               | Intervention Description                                                                                                                                                                | Intervention Duration | Intervention Delivered By | Stroke Severity Measure | Sample Size and Characteristics                                                                                                                                    | Main Outcome Measures                                                                  | Main Results                                                                                                                                                             | Quality of Evidence |
|-------------------------------------|-----------------------------------------------------------------------------------------------------------------------------------------------------------------------------------------|-----------------------|---------------------------|-------------------------|--------------------------------------------------------------------------------------------------------------------------------------------------------------------|----------------------------------------------------------------------------------------|--------------------------------------------------------------------------------------------------------------------------------------------------------------------------|---------------------|
| Rodrigues et al. 2017 <sup>29</sup> | Robot-assisted BWS treadmill gait training with progressively increased speeds<br>vs<br>Robot-assisted bodyweight supported treadmill gait training with progressively decreased speeds | 6 weeks               | Not reported              | LL FMA<br>FAC           | Faster speed group (n=10)<br>Median FAC 1.5 (1–2)<br>Mean LL FMA 19.5 (SD 4.6)<br><br>Slower speed group (n=10)<br>Median FAC 1 (1–2)<br>Mean LL FMA 17.5 (SD 2.8) | FAC, TUG, 6MWT, 10MWT, BBS, LL FMA                                                     | Improvements in FAC, FMA, TUG and 6MWT in the slower speed group compared to the faster speed group.                                                                     | Very low            |
| Sackley et al. 2015 <sup>30</sup>   | OT intervention<br>vs<br>Usual care                                                                                                                                                     | 3 months              | OTs                       | BI^                     | OT intervention group-<br>BI 0-4 n=268<br>BI 5-9 n=129<br><br>Usual care group-<br>BI 0-4 n=234<br>BI 5-9 n=104                                                    | BI, RMI, GDS, EQ-5D-3L                                                                 | No differences between the groups on any outcome measure at 3-, 6- and 12-months post-randomisation. Higher fall rate per resident in OT intervention group at 3 months. | High                |
| Volpe et al. 2008 <sup>31</sup>     | Intensive standard UL therapy<br>vs<br>Intensive robot-assisted UL therapy                                                                                                              | 6 weeks               | Therapists                | NIHSS                   | Therapist group (n=10)<br>Mean NIHSS 17 (SD 1)<br><br>Robot group (n=11)<br>Mean NIHSS 17 (SD 1)                                                                   | FMA- UL, MRC-shoulder/ elbow, mAS, UL PROM, SIS, ARAT, BDS, shoulder dislocation, pain | No difference between groups in shoulder and elbow strength and motor function. No improvements in other outcome measures for both groups.                               | Very low            |
| Zhang and Li 2014 <sup>32</sup>     | Trunk acupuncture + rehabilitation training<br>vs<br>Rehabilitation training alone                                                                                                      | 16 weeks              | Not reported              | BI*                     | Acupuncture group (n=30)<br>Mean BI 22.50 (SD 6.79)<br><br>Rehabilitation group (n=29)<br>Mean BI 24.48 (SD 7.23)                                                  | BI, BBS                                                                                | Acupuncture group demonstrated higher scores on BI and BBS compared to the rehabilitation group.                                                                         | Very low            |

ARAT- Action Research Arm Test, AROM- active range of movement, AS- Ashworth Scale, BBS- Berg Balance Scale, BDS- Becks Depression Scale, BI\*- Barthel Index (original version scored out of 100), BI^ - Barthel Index(revised version score out of 20), BS- Borg Scale, BWS- bodyweight supported, CNS- Canadian Neurological Scale, CRP- continuous relative phase, CSI- Caregiver Strain Index, EQ-5D-3L- EuroQoL questionnaire, FAC- Functional Ambulation Category, FAI- Frenchay Activities Index, FIM- Functional Independence Measure, FMA- Fugl-Meyer Assessment, FTHUE- Functional Test for the Hemiplegic Upper Extremity, GDS- Geriatric Depression Scale, GHQ-28- General Health Questionnaire-28, HADS- Hospital Anxiety and Depression Scale, LL- lower limb, MAS- Motor Assessment Scale, mAS- Modified Ashworth Scale, MCA- Motor Club Assessment, MI- Motricity Index, mMAS- Modified Motor Assessment Scale, MMSE- Mini-Mental State Examination, mNIHSS- Modified National Institutes of Health Stroke Scale, mRS- Modified Rankin Scale, MRC- Medical Research Council Scale for Muscle Strength, NEADL- Nottingham Extended Activities of Daily Living, NHP- Nottingham Health Profile, NIHSS- National Institutes of Health Stroke Scale, OT- occupational therapist, PASS- Postural Assessment Scale for Stroke Patients, PROM- passive range of movement, PT- physiotherapist, PTA- physiotherapy assistant, RMA- Rivermead Motor Assessment, RMI- Rivermead Mobility Index, RS- Rankin Scale, SIP- Stroke Impact Profile, SIS- Stroke Impact Scale, ST- speech therapist, STREAM- Stroke Rehabilitation Assessment of Movement, TCT- Trunk Control Test, THPT- Ten-Hole Peg Test, TUG- Timed Up and Go, UL- upper limb, WHS- Walking Handicap Scale, 6MWT- 6 minute walk test, 10MWT- 10 metre walk test

Supplementary Table 4- Overview of Measures of Physical Function and Immobility-Related Complications

| Body Function                                | Activity                                         | Participation                                  | Complications                 |
|----------------------------------------------|--------------------------------------------------|------------------------------------------------|-------------------------------|
| <b>Cardiorespiratory Function</b>            | <b>Activities of Daily Living</b>                | <b>Instrumental Activities of Daily Living</b> | <b>Adverse Effects</b>        |
| Aerobic capacity                             | Barthel Index                                    | Frenchay Activities Index                      | Pain                          |
| Borg scale                                   | Functional Independence Measure- motor           | Nottingham Extended ADL Scale                  | Shoulder dislocation          |
| Cardiovascular response                      | Functional Independence Measure- total           | Meal preparation                               |                               |
| Ventilatory response                         | Modified Rankin Scale                            |                                                |                               |
|                                              |                                                  | <b>Perceived Health Status</b>                 | <b>Caregiver Burden</b>       |
| <b>Neurological Impairment</b>               | <b>Balance and Postural Control</b>              | Stroke Impact Scale                            | Caregiver Strain Index        |
| Canadian Neurological Scale                  | Berg Balance Scale                               | General Health Questionnaire-28                |                               |
| National Institutes of Health Stroke Scale   | Postural Assessment Scale for Stroke             |                                                | <b>Depression</b>             |
|                                              | Trunk Control Test                               |                                                | Beck Depression Scale         |
|                                              | Vertical Posture Test                            |                                                | Geriatric Depression Scale    |
|                                              |                                                  | <b>Quality of Life</b>                         | Hospital and Depression Scale |
| <b>Sensorimotor Function</b>                 |                                                  | EQ-5D                                          |                               |
| Active range of movement- UL                 | <b>Gait</b>                                      | Nottingham Health Profile                      |                               |
| Grip strength                                | Continuous relative phase between UL/LL movement | Sickness Impact Profile                        | <b>Mortality</b>              |
| Fugl Meyer- UL                               | Comfortable/maximal walking speed                |                                                | Mortality                     |
| Fugl Meyer- LL                               | Functional Ambulation Category                   |                                                |                               |
| Fugl Meyer- UL and LL                        | Number of independent walkers                    |                                                |                               |
| Motricity Index                              | Time taken to walk 50 metres independently       |                                                | <b>Spasticity</b>             |
| Medical Research Council strength- UL        | Walking Handicap Scale                           |                                                | Modified Ashworth Scale       |
| Medical Research Council strength- LL        | 6 minutes walking test                           |                                                |                               |
| Medical Research Council strength- UL and LL | 10 metre walking test                            |                                                |                               |
| Number of upper limb movements               |                                                  |                                                |                               |
| Sensation/proprioception                     |                                                  |                                                |                               |
| Sensorimotor integration test                |                                                  |                                                |                               |
|                                              | <b>General Physical Activity</b>                 |                                                |                               |
|                                              | Modified Bobath Scale                            |                                                |                               |
|                                              | Motor Assessment Scale                           |                                                |                               |
|                                              | Rivermead Motor Assessment                       |                                                |                               |
|                                              | Rivermead Mobility Index                         |                                                |                               |
|                                              | Stroke Rehabilitation Assessment of Movement     |                                                |                               |
|                                              | Timed Up and Go                                  |                                                |                               |
|                                              | <b>Upper Limb Function</b>                       |                                                |                               |
|                                              | Action Research Arm Test                         |                                                |                               |
|                                              | Functional Test for Hemiplegic Upper Extremity   |                                                |                               |
|                                              | 9 Hole Peg Test                                  |                                                |                               |
|                                              | 10 Hole Peg Test                                 |                                                |                               |

## Supplementary Results- Outcomes Supported by Low or Very Low-Quality Evidence

### Body function

#### Cardiorespiratory Function

Two studies explored participants' cardiorespiratory response to different types of treadmill gait training within the acute to early subacute phase post-stroke.<sup>4,8</sup> There was low-quality evidence that 2 weeks of robot-assisted bodyweight supported treadmill gait training delivered in the first 6 weeks post-stroke improved peak VO<sub>2</sub> compared to conventional gait training.<sup>4</sup> There was low-quality evidence that a 4-week course of bodyweight supported treadmill training delivered in the first 3 months post-stroke was not perceived to be more effortful than conventional gait training.<sup>8</sup>

#### Neurological Impairment

Three studies evaluated changes in neurological function.<sup>6,25,27</sup> In the acute to early subacute phase post-stroke, there was very low-quality evidence that there was no difference in an intensive or ordinary 2-week acute physical rehabilitation programme on reducing neurological impairment at 2 weeks and 6 months post-stroke.<sup>6</sup> In the acute to late subacute phase post-stroke, there was very low-quality evidence that a 3-month course of robot-assisted bodyweight supported treadmill gait training commenced within the first 6 weeks post-stroke was just as effective as conventional gait training on improving neurological function.<sup>25</sup> There was very low-quality evidence that an 8-week course of acupuncture provided in conjunction with rehabilitation during the subacute phase of stroke reduced neurological impairment compared to rehabilitation alone.<sup>27</sup>

#### Sensorimotor Function

Sixteen studies evaluated changes in sensorimotor function. Nine studies were performed in the acute to early subacute phase post-stroke,<sup>3-5,7,8,10-13</sup> five studies in the acute to late subacute phase post-stroke,<sup>18,21,25,27,28</sup> and two studies in the chronic phase post-stroke.<sup>29,31</sup> In the acute to early subacute phase post-stroke, there was low quality evidence from two studies that thermal stimulation in conjunction with standard rehabilitation resulted in improvements in lower limb sensorimotor function and strength when compared to standard rehabilitation alone.<sup>5,10</sup> Improvements in lower limb sensorimotor function were maintained at 12 months post-intervention. There was low quality evidence that 2 weeks of robot-assisted bodyweight supported treadmill gait training resulted in improvements in lower limb sensorimotor function but not strength compared to conventional gait training.<sup>4</sup> There was low quality evidence that there was no difference between: 4 weeks of robot-assisted treadmill gait training and conventional gait training on improving lower limb sensorimotor function;<sup>13</sup> wearing a cueing wristwatch and wearing a sham wristwatch for 3 hours per weekday for 3 weeks during rehabilitation on improving upper limb sensorimotor function and number of arm movements;<sup>7</sup> a 4-week course of bodyweight supported treadmill training and conventional overground gait training on improving lower limb strength;<sup>8</sup> and a 5-week course of additional upper limb therapy provided by a qualified physiotherapist or a physiotherapy assistant and standard physiotherapy on improving upper limb motor activity and grip strength.<sup>11</sup> There was very low-quality evidence that a thrice weekly, 6-week course of electromyography (EMG) biofeedback combined with conventional physiotherapy had no effect on improving lower limb active range of movement when compared to conventional

physiotherapy alone.<sup>3</sup> There was very low-quality evidence that a 3-month course of acupuncture in conjunction with rehabilitation resulted in better upper and lower limb sensorimotor function when compared to rehabilitation alone.<sup>12</sup> In the acute to late subacute phase post-stroke, there was very low quality evidence that a 6-week course of robotic tilt-table verticalisation that combines cyclic leg movements and FES and used in conjunction with standard physiotherapy resulted in better lower limb strength and sensorimotor function compared to physiotherapy-assisted verticalisation using a standard tilt-table and used in conjunction with standard physiotherapy.<sup>18</sup> There was very low-quality evidence that an 8-week course of acupuncture provided in conjunction with rehabilitation resulted in improvements in upper and lower limb sensorimotor function compared to rehabilitation alone.<sup>27</sup> There was very low-quality evidence that a 3-month course of nurse-led acupressure resulted in improvements in upper and lower limb motor function compared to routine care.<sup>28</sup> There was very low quality evidence that there was no difference between: a functionally-orientated and a sensorimotor integrative occupational therapy treatment approach delivered over 8 weeks on improving upper limb sensorimotor function;<sup>21</sup> and a 3-month course of robot-assisted bodyweight supported treadmill gait training and conventional gait training on improving lower limb power.<sup>25</sup> In the chronic phase post-stroke, there was very low-quality evidence that a 6-week course of robot-assisted bodyweight supported treadmill gait training using slower treadmill speeds resulted in improvements in lower limb sensorimotor function compared to similar treadmill training using faster treadmill speeds.<sup>29</sup> There was very low-quality evidence that either an intensive therapist-driven UL protocol or an intensive robotic-driven UL protocol delivered thrice weekly for 6 weeks resulted in an improvement in shoulder and elbow sensorimotor function.<sup>31</sup>

## Activity

### Activities of Daily Living

Sixteen studies explored independence and ability to perform activities of daily living (ADLs). Nine studies were completed in the acute to early subacute phase,<sup>2,6-8,10-13,15</sup> six studies were completed in acute to late subacute phase<sup>17,19-21,25,27,28</sup> and one study was completed in the chronic phase.<sup>32</sup>

In the acute to early subacute phase, there was low quality evidence that a 6-week course of thermal stimulation used in conjunction with standard rehabilitation resulted in improvements in ADL independence 3 months post-stroke compared to standard rehabilitation alone, although improvements were not seen at 6 months post-stroke.<sup>10</sup> There was low quality evidence that there was no difference between: regular physiotherapy and regular physiotherapy in conjunction with use of an Oswestry standing frame delivered over 14 consecutive weekdays in the first 3 months post-stroke on ADL independence;<sup>2</sup> wearing a cueing wristwatch and wearing a sham wristwatch for 3 hours per weekday for 3 weeks during rehabilitation on ADL independence;<sup>7</sup> a 4-week course of bodyweight supported treadmill training and conventional overground gait training on improving ADL independence;<sup>8</sup> a 5-week course of additional upper limb therapy provided by a qualified physiotherapist or a physiotherapy assistant and standard physiotherapy on improving ADL independence;<sup>11</sup> and 4 weeks of robot-assisted treadmill gait and conventional overground gait training on ADL independence.<sup>13</sup> There was very low-quality evidence that there was no difference in an intensive or ordinary 2-week acute physical rehabilitation programme in improving ADL independence at 2 weeks

and 6 months post-stroke.<sup>6</sup> There was very low-quality evidence that a 3-month course of acupuncture in conjunction with rehabilitation resulted in better ADL independence when compared to rehabilitation alone.<sup>12</sup> There was very low-quality evidence that providing additional physiotherapy in conjunction to regular rehabilitation in the first few weeks post-stroke resulted in improvements in ADL independence at 6 months post-stroke compared to regular rehabilitation alone.<sup>15</sup>

In the acute to late subacute phase, there was low quality evidence that a 6-month course of a staged physical rehabilitation programme resulted in greater improvements in ADL independence compared to usual care that did not involve formal rehabilitation.<sup>17</sup> There was very low-quality evidence that a monthly home-based physiotherapy programme delivered over 6 months resulted in improvements in ADL independence compared to standard care.<sup>19,20</sup> There was very low-quality evidence that there was no difference between a functionally orientated or a sensorimotor integrative occupational therapy treatment approach delivered over 8 weeks on ADL independence.<sup>21</sup> There was very low-quality evidence that a 3-month course of robot-assisted bodyweight supported treadmill gait training resulted in improvements in ADL independence compared to conventional gait training.<sup>25</sup> Improvements were only seen in the cohort of participants who demonstrated significant motor impairment. Improvements were maintained at the 2-year follow-up.<sup>26</sup> There was very low-quality evidence that an 8-week course of acupuncture provided in conjunction with rehabilitation during the subacute phase of stroke improved ADL independence compared to rehabilitation alone.<sup>27</sup> There was very low-quality evidence that a 3-month course of nurse-led acupressure resulted in improvements in ADL independence compared to routine care.<sup>28</sup>

In the chronic phase, there was very low-quality evidence that a 16-week course of trunk acupuncture combined with rehabilitation training resulted in greater improvements in ADL independence compared to rehabilitation training alone.<sup>32</sup>

#### Balance and Postural Control

Eight studies investigated balance and postural control. Four studies were completed in the acute to early subacute phase,<sup>2,5,10,16</sup> two studies were completed in the acute to late subacute phase<sup>18,25</sup> and two studies were completed in the chronic phase.<sup>29,32</sup>

In the acute to early subacute phase, there was low quality evidence that a 6-week course of thermal stimulation in conjunction with standard rehabilitation resulted in improvements in trunk postural control but not balance compared to standard rehabilitation alone.<sup>5</sup> In a separate study, there was low quality evidence that a 6-week course of thermal stimulation in conjunction with standard rehabilitation resulted in improvements in balance 3 months post-stroke compared to standard rehabilitation alone, although improvements were not seen at 6 months post-stroke.<sup>10</sup> There was low quality evidence that there was no difference between regular physiotherapy and regular physiotherapy in conjunction with use of an Oswestry standing frame delivered over 14 consecutive weekdays in the first 3 months post-stroke on trunk postural control.<sup>2</sup> There was low quality evidence that an 8-week course of physiotherapy involving early mobilisation combined with the Bobath approach resulted in improvements in balance when compared to physiotherapy just involving the Bobath approach.<sup>16</sup>

In the acute to late subacute phase, there was very low quality evidence that a 6-week course of robotic tilt-table verticalisation that combines cyclic leg movements and FES and used in conjunction with standard physiotherapy resulted in improved postural control

during different activities compared to physiotherapy-assisted verticalisation using a standard tilt-table and used in conjunction with standard physiotherapy.<sup>18</sup> There was very low-quality evidence that a 3-month course of robot-assisted bodyweight supported treadmill gait training resulted in improvements in trunk control compared to conventional gait training.<sup>25</sup> Improvements were only seen in the cohort of participants who demonstrated significant motor impairment.

In the chronic phase, there was very low-quality evidence that a 6-week course of robot-assisted bodyweight supported treadmill gait training resulted in improvements in balance regardless if slower or faster treadmill training speeds were used.<sup>29</sup> There was very low-quality evidence that a 16-week course of trunk acupuncture combined with rehabilitation training resulted in greater improvements in balance compared to rehabilitation training alone.<sup>32</sup>

### Gait

Eight studies investigated gait, which included gait ability and gait speed. Six studies were performed in the acute to early subacute phase,<sup>3-5,8,10,13</sup> one study was performed in the acute to late subacute phase<sup>25</sup> and one study was performed in the chronic phase.<sup>29</sup> In the acute to early subacute phase, there was low quality evidence from two studies that a 6-week course of thermal stimulation in conjunction with standard rehabilitation resulted in improvements in gait ability compared to standard rehabilitation alone.<sup>5,10</sup> There was low quality evidence that 4 weeks of robot-assisted treadmill gait training resulted in better gait ability than conventional gait training.<sup>13</sup> There was low quality evidence that there was no difference between: a 2-week course of robot-assisted bodyweight supported treadmill gait training and conventional gait training delivered in the first 6 weeks post-stroke on improving gait ability;<sup>4</sup> a 4-week course of bodyweight supported treadmill training and conventional overground gait training on improving gait ability;<sup>8</sup> and a thrice weekly, 6-week course of EMG biofeedback combined with conventional physiotherapy and conventional physiotherapy alone in improving gait speed.<sup>3</sup> In the acute to late subacute phase, there was very low-quality evidence that a 3-month course of robot-assisted bodyweight supported treadmill gait training resulted in improvements in gait ability compared to conventional gait training.<sup>25</sup> Improvements were only seen in the cohort of participants who demonstrated significant motor impairment. Improvements were maintained at the 2-year follow-up.<sup>26</sup> In the chronic phase, there was very low-quality evidence that a 6-week course of robot-assisted bodyweight supported treadmill gait training using slower treadmill speeds resulted in improvements gait ability compared to similar treadmill training using faster treadmill speeds.<sup>29</sup>

### General Physical Activity

Seven studies examined the effects of different interventions on improving general physical activity. Six studies were performed in the acute to early subacute phase<sup>2,3,5,10,11,16</sup> and one study was performed in the acute to late subacute phase.<sup>25</sup> In the acute to early subacute phase, there was low quality evidence from two studies that thermal stimulation in conjunction with standard rehabilitation resulted in improvements in physical activity when compared to standard rehabilitation alone.<sup>5,10</sup> Improvements were seen up until 3 months post-intervention but disappeared at the 6-month follow-up. There was low quality evidence that an 8-week course of physiotherapy involving early mobilisation combined with the Bobath approach resulted in improvements in physical activity when compared to

physiotherapy just involving the Bobath approach.<sup>16</sup> There was low quality evidence that there was no difference between: regular physiotherapy and regular physiotherapy in conjunction with use of an Oswestry standing frame delivered over 14 consecutive weekdays in the first 3 months post-stroke on physical activity;<sup>2</sup> and a 5-week course of additional upper limb therapy provided by a qualified physiotherapist or a physiotherapy assistant and standard physiotherapy on improving physical activity.<sup>11</sup> There was very low-quality evidence that there was no difference between a thrice weekly, 6-week course EMG biofeedback combined with conventional physiotherapy and conventional physiotherapy alone on improving physical activity.<sup>3</sup>

In the acute to late subacute phase, there was very low-quality evidence that a 3-month course of robot-assisted bodyweight supported treadmill gait training resulted in improvements in physical activity compared to conventional gait training.<sup>25</sup> Improvements were only seen in the cohort of participants who demonstrated significant motor impairment. Improvements were maintained at the 2-year follow-up.<sup>26</sup>

### Upper Limb Function

Two studies investigated changes in upper limb function.<sup>11,31</sup> In the acute to early subacute phase, there was low quality evidence that a 5-week course of additional upper limb therapy provided by a qualified physiotherapist was no more effective at improving upper limb function than additional upper limb therapy provided by a physiotherapy assistant or to standard physiotherapy.<sup>11</sup> In the chronic phase, there was very low-quality evidence that there was no improvement in upper limb function with either an intensive therapist-driven UL protocol or an intensive robotic-driven UL protocol delivered thrice weekly for 6 weeks.<sup>31</sup>

### Participation

#### Instrumental Activities of Daily Living

Four studies investigated the effect of different interventions on instrumental ADLs.<sup>2,3,9,21</sup> In the acute to early subacute phase, there was low quality evidence that there was no difference between: regular physiotherapy and regular physiotherapy in conjunction with use of an Oswestry standing frame delivered over 14 consecutive weekdays on ability to perform instrumental ADLs at 6 months post-stroke,<sup>2</sup> and an 8-week course of rehabilitation with the addition of a leg cycling machine compared to regular rehabilitation alone on instrumental ADLs 6 months post stroke.<sup>9</sup> There was very low-quality evidence that there was no difference between a thrice weekly, 6-week course of electromyography (EMG) biofeedback combined with conventional physiotherapy and conventional physiotherapy alone in improving performance in instrumental ADLs.<sup>3</sup>

In the acute to late subacute phase, there was very low-quality evidence that there was no difference between a functionally orientated or a sensorimotor integrative occupational therapy treatment approach delivered over 8 weeks on the ability to prepare meals.<sup>21</sup>

### Perceived Health Status

Two studies explored carers' and patients' perceived health status.<sup>2,31</sup> In the acute to early subacute phase, there was low quality evidence that there was no difference between regular physiotherapy and regular physiotherapy in conjunction with use of an Oswestry standing frame delivered over 14 consecutive weekdays on carer's perceived health status at 12 weeks and 6 months post-stroke.<sup>2</sup> In the chronic phase, there was very low-quality evidence that there was no change in patient's perceived health status with the provision of

either an intensive therapist-driven UL protocol or an intensive robotic-driven UL protocol delivered thrice weekly for 6 weeks.<sup>31</sup>

#### Quality of Life

There was very low-quality evidence that a monthly home-based physiotherapy programme delivered over 6 months resulted in an improvement in quality of life compared to standard care.<sup>19</sup>

#### Complications

##### Caregiver Burden

There was low quality evidence that there was no difference between regular physiotherapy and regular physiotherapy in conjunction with use of an Oswestry standing frame delivered over 14 consecutive weekdays in the first 3 months post-stroke on caregiver strain and psychological well-being at 12 weeks and 6 months post-stroke.<sup>2</sup>

##### Depression

Three studies explored changes in depression.<sup>2,20,31</sup> In the acute to early subacute phase, there was low quality evidence that there was no difference between regular physiotherapy and regular physiotherapy in conjunction with use of an Oswestry standing frame delivered over 14 consecutive weekdays on depression at 12 weeks and 6 months post-stroke.<sup>2</sup> In the acute to late subacute phase, there was very low-quality evidence that a monthly home-based physiotherapy programme delivered over 6 months resulted in a reduction in level of depression compared to standard care.<sup>20</sup> In the chronic phase, there was very low-quality evidence that there was no difference between an intensive therapist-driven UL protocol and an intensive robotic-driven UL protocol delivered thrice weekly for 6 weeks in reducing depression.<sup>31</sup>

##### Shoulder Pain/Dislocation

There was very low-quality evidence that either an intensive therapist-driven UL protocol or an intensive robotic-driven UL protocol delivered thrice weekly for 6 weeks had no effect on shoulder pain nor caused any shoulder dislocation when delivered to participants in the chronic phase post-stroke.<sup>31</sup>

##### Spasticity

Six studies explored the effect of different interventions on spasticity.<sup>3,8,11,17,25,31</sup> In the acute to early subacute phase, there was low quality evidence that there was no difference between: bodyweight supported treadmill training and conventional overground gait training delivered over 4 weeks on reducing lower limb spasticity;<sup>8</sup> and a 5-week course of additional upper limb therapy provided by a qualified physiotherapist or a physiotherapy assistant and standard physiotherapy on reducing upper limb spasticity.<sup>11</sup> There was very low-quality evidence that there was no reduction in spasticity with a 6-week course of conventional physiotherapy with or without EMG biofeedback.<sup>3</sup>

In the acute to late subacute phase, there was low quality evidence that a 6-month course of a staged physical rehabilitation programme resulted in a lower incidence of upper and lower limb spasticity compared to usual care that did not involve formal rehabilitation.<sup>17</sup>

There was very low-quality evidence that a 3-month course of either robot-assisted

bodyweight supported treadmill training or conventional gait training had no effect on reducing lower limb spasticity.<sup>25</sup>

In the chronic phase, there was very low-quality evidence that there was no difference between an intensive therapist-driven UL protocol and an intensive robotic-driven UL protocol delivered thrice weekly for 6 weeks in reducing UL spasticity.<sup>31</sup>

### Supplemental References

- 1 AVERT Trial Collaboration group. Efficacy and safety of very early mobilisation within 24 h of stroke onset (AVERT): a randomised controlled trial. *Lancet* 2015;386:46-55.
- 2 Bagley P, Hudson M, Forster A, et al. A randomized trial evaluation of the Oswestry Standing Frame for patients after stroke. *Clin Rehabil* 2005;19:354-364.
- 3 Bradley L, Hart BB, Mandana S, et al. Electromyographic biofeedback for gait training after stroke. *Clin Rehabil* 1998;12:11-22.
- 4 Chang WH, Kim MS, Huh JP, et al. Effects of Robot-Assisted Gait Training on Cardiopulmonary Fitness in Subacute Stroke Patients: A Randomized Controlled Study. *Neurorehab Neural Re* 2012;26(4):318-324.
- 5 Chen JC, Lin CH, Wei YC, et al. Facilitation of motor and balance recovery by thermal intervention for the paretic lower limb of acute stroke: a single-blind randomized clinical trial. *Clin Rehabil* 2011;25(9):823-832.
- 6 Di Lauro A, Pellegrino L, Savastano G, et al. A randomized trial on the efficacy of intensive rehabilitation in the acute phase of ischemic stroke. *J Neurol* 2003;250:1206-1208.
- 7 Fong K, Yang N, Chan M, et al. Combined effects of sensory cueing and limb activation on unilateral neglect in subacute left hemiplegic stroke patients: a randomized controlled pilot study. *Clin Rehabil* 2013;27(7):628-637.
- 8 Franceschini M, Carda S, Agosti M, et al. Walking After Stroke: What Does Treadmill Training With Body Weight Support Add to Overground Gait Training in Patients Early After Stroke? A Single-Blind, Randomized, Controlled Trial. *Stroke* 2009;40:3079-3085.
- 9 Katz-Leurer M, Carmeli E and Shochina M. The effect of early aerobic training on independence six months post stroke. *Clin Rehabil* 2003;17:735-741.
- 10 Liang CC, Hsieh TC, Lin CH, et al. Effectiveness of Thermal Stimulation for the Moderately to Severely Paretic Leg After Stroke: Serial Changes at One-Year Follow-Up. *Arch Phys Med Rehab* 2012;93:1903-1910.
- 11 Lincoln NB, Parry RH and Vass CD. Randomized, Controlled Trial to Evaluate Increased Intensity of Physiotherapy Treatment of Arm Function After Stroke. *Stroke* 1999;30:573-579.
- 12 Min M, Xin C, Yuefeng C, et al. Stage-oriented Comprehensive Acupuncture Treatment plus Rehabilitation Training for Apoplectic Hemiplegia. *J Tradit Chin Med* 2008;28(2):90-93.
- 13 Ochi M, Wada F, Saeki S, et al. Gait training in subacute non-ambulatory stroke patients using a full weight-bearing gait-assistance robot: A prospective, randomized, open, blinded-endpoint trial. *J Neurol Sci* 2015;353:130-136.

- 14 Rosewilliam S, Malhotra S, Roffe C, et al. Can surface neuromuscular electrical stimulation of the wrist and hand combined with routine therapy facilitate recovery of arm function in patients with stroke? *Arch Phys Med Rehab* 2012;93(10):1715-1721.
- 15 Sanchez-Sanchez ML, Belda-Lois JM, Horno SM, et al. Functional principal component analysis as a new methodology for the analysis of the impact of two rehabilitation protocols in functional recovery after stroke. *J Neuroeng Rehabil* 2014;11:134.
- 16 Tang Q, Tan L, Li B, et al. Early Sitting, Standing, and Walking in Conjunction With Contemporary Bobath Approach for Stroke Patients With Severe Motor Deficit. *Top Stroke Rehabil* 2014;21(2):120-127.
- 17 Bai YL, Hu YS, Wu Y, et al. Long-term three-stage rehabilitation intervention alleviates spasticity of the elbows, fingers, and plantar flexors and improves activities of daily living in ischemic stroke patients: a randomized, controlled trial. *Neuroreport* 2014;25:998-1005.
- 18 Calabro RS, Naro A, Russo M, et al. Do post-stroke patients benefit from robotic verticalization? A pilot-study focusing on a novel neurophysiological approach. *Restor Neurol and Neuros* 2015;33:671-681.
- 19 Chaiyawat P and Kulkantrakorn K. Effectiveness of home rehabilitation program for ischemic stroke upon disability and quality of life: A randomized controlled trial. *Clin Neurol Neuros* 2012;114:866-870.
- 20 Chaiyawat P and Kulkantrakorn K. Randomized controlled trial of home rehabilitation for patients with ischemic stroke: impact upon disability and elderly depression. *Psychogeriatrics* 2012;12:193-199.
- 21 Jongbloed L, Stacey S and Brighton C. Stroke Rehabilitation: Sensorimotor Integrative Treatment Versus Functional Treatment. *Am J Occup Ther* 1989;43(6):391-397.
- 22 Kwakkel G, Wagenaar RC, Twisk JWR, et al. Intensity of leg and arm training after primary middle-cerebral artery stroke: a randomised trial. *Lancet* 1999;354:191-196.
- 23 Kwakkel G, Kollen BJ and Wagenaar RC. Long term effects of intensity of upper and lower limb training after stroke: a randomised trial. *J Neurol Neurosurg Ps* 2002;72:473-479.
- 24 Kwakkel G and Wagenaar RC. Effect of Duration of Upper- and Lower-Extremity Rehabilitation Sessions and Walking Speed on Recovery of Interlimb Coordination in Hemiplegic Gait. *Phys Ther* 2002;82(5):432-448.
- 25 Morone G, Bragoni M, Iosa M, De Angelis D, Venturiero V, Coiro P. Who May Benefit From Robotic- Assisted Gait Training? A Randomized Clinical Trial in Patients With Subacute Stroke. *Neurorehab Neural Re* 2011;25(7):636-644.
- 26 Morone G, Iosa M, Bragoni M, De Angelis D, Venturiero V, Coiro P. Who May Have Durable Benefit From Robotic Gait Training? A 2-Year Follow-Up Randomized Controlled Trial in Patients With Subacute Stroke. *Stroke* 2012;43:1140-1142.
- 27 Yang XH, Bing L and Ba-si O. Effect of acupuncture combined with rehabilitative training on neural functional recovery of stroke patients during recovery phase: a randomized controlled trial. *World J Acupunct Mox* 2014;24(4):17-23.
- 28 Yue S, Jian X and Wong T. Effects of a nurse-led acupressure programme for stroke patients in China. *J Clin Nurs* 2012;22:1182-1188.

- 29 Rodrigues TA, Goroso DG, Westgate PM, et al. Slow Versus Fast Robot-Assisted Locomotor Training After Severe Stroke. A Randomized Controlled Trial. *Am J Phys Med Rehab* 2017;96(Suppl):S165–S170.
- 30 Sackley CM, Walker MF, Burton CR, et al. An occupational therapy intervention for residents with stroke related disabilities in UK care homes (OTCH): cluster randomised controlled trial. *BMJ* 2015;350:h468.
- 31 Volpe BT, Lynch D, Rykman-Berland A, et al. Intensive Sensorimotor Arm Training Mediated by Therapist or Robot Improves Hemiparesis in Patients With Chronic Stroke. *Neurorehabil Neural Re* 2008;22:305-310.
- 32 Zhang HY and Li PF. Observation on efficacy of acupuncture combined with rehabilitation training for post-stroke balance disorders. *World J Acupunct Mox* 2014;24(2):25-29.
